# Supplementary material for: Gamification of Behavior Change: Mathematical Principle and Proof-of-Concept Study
Source: JMIR Serious Games. 2024 Mar 22;12:e43078. doi: 10.2196/43078 (PMC10998180; doi:10.2196/43078)
Supplement: Multimedia Appendix 1 [file games_v12i1e43078_app1.docx]

# Multimedia Appendix 1. [An optimal feedback method for accelerating positive behavior change.](https://games.jmir.org/api/download?filename=7602e3ff08da6cd5c4dda95c6947c86c.docx&alt_name=43078-683322-3-SP.docx)

We have modelled behavior change as an MDP , where is the set of possible habit strengths, the possible actions are to either enact the desired behavior or not, the transition function is a deterministic model of habit formation, the rewards encodes the effort of enacting the behavior and the health benefits of having established it as a habit, and the initial state is the initial strength of the person’s habit. Moreover, we will refer to the value of after actions as .

If the person always enacts the desired behavior, the distance of the habit strength from decays exponentially with the number of time steps. So, for , we get . Under these conditions the sum of the rewards obtained by always enacting the desired behavior is

where is the number of times that the behavior has to be performed until the terminal state is reached.

Therefore, the feedback for taking the action is .

The feedback for not doing the action is

We can compute by finding the smallest value of for which . This value can be computed by rounding up the number .
